# Supplementary material for: Ru single atoms and nanoparticles on carbon nanotubes as multifunctional catalysts
Source: Royal Society of Chemistry journal article supplement (doi:10.1039/d0dt02096f), 2020-01-01
Supplement: d0dt02096f1.pdf [file d0dt02096f1.pdf]

## SUPPORTING INFORMATION

### **Ru single atoms and nanoparticles on carbon nanotubes as multifunctional catalysts**

Diana M. Fernandes,<sup>1,\*</sup> Mariana Rocha,<sup>1</sup> Camila Rivera-Cárcamo,<sup>2</sup> Philippe Serp<sup>2</sup>, Cristina Freire<sup>1</sup>

- 1 REQUIMTE/LAQV, Departamento de Química e Bioquímica, Faculdade de Ciências da Universidade do Porto, Rua do Campo Alegre s/n, 4169-007 Porto, Portugal
- 2 LCC-CNRS, INPT, 205 route de Narbonne, 31077 Toulouse Cedex 4, France

\* **Corresponding author:** Diana M. Fernandes, Email: [diana.fernandes@fc.up.pt](mailto:diana.fernandes@fc.up.pt)

## 1. Experimental

### 1.1. Material preparation

**Carbon nanotube synthesis:**<sup>1</sup> An  $\text{AlFeCoO}_4$  catalyst was reduced in a fluidized bed reactor under a nitrogen ( $225 \text{ mL min}^{-1}$ ) and hydrogen ( $150 \text{ mL min}^{-1}$ ) flow at  $650 \text{ }^\circ\text{C}$ . After the reduction step, the ethylene flow was adjusted to  $225 \text{ mL min}^{-1}$  for 30 min to produce CNT. The CNT were recovered and then purified using an aqueous solution (50 vol%  $\text{H}_2\text{SO}_4$ ) under reflux at  $140 \text{ }^\circ\text{C}$  for 3 h. The acidic solution was then filtered and the solid washed with distilled water. The resulting solid was dried in an oven at  $80 \text{ }^\circ\text{C}$  overnight. A portion of purified CNT was then functionalized with  $\text{HNO}_3$  under reflux at  $140 \text{ }^\circ\text{C}$  for 3 h. The acidic solution was filtered and washed with distilled water. The resulting solid was dried in an oven at  $80 \text{ }^\circ\text{C}$  overnight to produce functionalized CNT (CNT).

### 1.2. Physicochemical characterization

TEM and HR-TEM analyses were performed at the “Centre de microcharacterisation Raimond Castaing, UMS 3623, Toulouse” by using a JEOL JEM 1011 CX-T electron microscope operating at 100 kV with a point resolution of  $4.5 \text{ \AA}$  and a JEOL JEM 1400 electron microscope operating at 120 kV. The high-resolution analyses were conducted by using a JEOL JEM 2100F equipped with a field emission gun (FEG) operating at 200 kV with a point resolution of  $2.3 \text{ \AA}$  and a JEOL JEM-ARM200F Cold FEG operating at 200 kV with a point resolution of  $> 1.9 \text{ \AA}$ .

XPS measurements were performed on a Thermo  $\text{K}\alpha$  spectrometer working at a base pressure of  $5 \times 10^{-9}$  mbar and equipped with a monochromatic Al  $\text{K}\alpha$  X-ray source (1486.7 eV). The spectra presented here were recorded with a Pass Energy of 20 eV. The data were processed with CasaXPS using Gaussian-lorentzian combinations and a Shirley background.

Scofield photoionization cross-sections<sup>2</sup> corrected for the transmission function of the analyser and the analysis depth were used for quantifications.

### **1.3. ORR and OER electrochemical tests**

#### **1.3.1. Materials and solvents**

For the electrochemical studies, the following reagents and solvents were used: potassium hydroxide (KOH, 99.99 %, Sigma-Aldrich), platinum nominally 20 % on carbon black (Pt/C 20 wt%, HiSPEC® 3000, Alfa Aesar), Nafion (5 wt.% in lower aliphatic alcohols and water, Aldrich), isopropanol (99.5 %, Aldrich), methanol (anhydrous, VWR) and hydrogen peroxide solution (30 wt.% in water, ACS reagent, Sigma Aldrich). Ultrapure water (18.2 MΩ cm at 25°C, Millipore) was used throughout the experiments.

#### **1.3.2. Electrode cleaning process**

Before modification, a cleaning procedure was performed to the RDE with diamond polishing pastes of 6, 3 and 1 μM (Buehler) on a microcloth pad (BAS), followed by washing with ultra-pure water (18.2 MΩ cm at 25°C, Millipore). For the RRDE, the cleaning procedure was performed only with 0.3 μm alumina powder (MicroPolish Alumina, Buehler) in order to prevent damage of Pt ring.

#### **1.3.3. ORR performance**

Both the CV and LSV measurements were performed between  $E_p = 0.26$  and 1.46 V vs. RHE at 0.005 V s<sup>-1</sup>. Additionally, rotation speeds in the range 400 - 3000 rpm were used for the LSV experiments. For the chronoamperometry (CA) tests a rotation speed of 1600 rpm for 20 000 s at a potential = 0.55 V vs. RHE was used. Tolerance to methanol was assessed by CA at  $E = 0.55$  V vs. RHE and 1600 rpm for 2500 s.

The effective ORR current was obtained by subtracting the current obtained in N<sub>2</sub>-saturated electrolyte by that obtained in O<sub>2</sub>-saturated.

Even though the potential were measured against the Ag/AgCl reference electrode these were converted to the reversible hydrogen electrode (RHE) using the Eq. 1 for a proper comparison with the literature results.

$$E_{(\text{RHE})} = E_{(\text{Ag}/\text{AgCl})} + 0.059 \text{ pH} + E_{(\text{Ag}/\text{AgCl})}^{\circ} \quad (\text{Eq. 1})$$

where  $E_{(\text{RHE})}$  is the potential vs. RHE,  $E_{(\text{Ag}/\text{AgCl})}^{\circ} = 0.1976 \text{ V}$  (25 °C) and  $E_{(\text{Ag}/\text{AgCl})}$  is the potential measure vs. Ag/AgCl.<sup>3</sup>

Onset potential ( $E_{\text{onset}}$ ) is defined as the potential at which the reduction of O<sub>2</sub> begins. According to literature the  $E_{\text{onset}}$  can be determined by different methods<sup>3-5</sup> and is generally assume as the potential at which the ORR current is 5% of the diffusion-limiting current density or it can be calculated as the potential at which the slope of the voltammogram exceeds a threshold value ( $j = 0.1 \text{ mA cm}^{-2}\text{V}^{-1}$ ).<sup>4, 5</sup> Here we considered the first method.

The kinetic parameters and the number of electrons transferred per O<sub>2</sub> molecule ( $n_{\text{O}_2}$ ) in the oxygen reduction reaction were determined using the following Koutecky-Levich equations:

$$\frac{1}{j} = \frac{1}{j_L} + \frac{1}{j_k} = \frac{1}{B\omega^{1/2}} + \frac{1}{j_k} \quad (\text{Eq. 2})$$

$$B = 0.2 n_{\text{O}_2} F (D_{\text{O}_2})^{2/3} \nu^{-1/6} C_{\text{O}_2} \quad (\text{Eq. 3})$$

Here,  $j$  is the current density measured,  $j_L$  and  $j_k$  are the diffusion-limiting and kinetic current densities,  $\omega$  is the angular velocity,  $F$  is the Faraday constant (96 485 C mol<sup>-1</sup>),  $D_{\text{O}_2}$  is the O<sub>2</sub> diffusion coefficient ( $1.95 \times 10^{-5} \text{ cm}^2 \text{ s}^{-1}$ ),  $\nu$  is the electrolyte kinematic viscosity ( $0.008977 \text{ cm}^2 \text{ s}^{-1}$ ),  $C_{\text{O}_2}$  is the O<sub>2</sub> bulk concentration ( $1.15 \times 10^{-3} \text{ mol dm}^{-3}$ ). For rotation speeds in rpm is adopted a constant of 0.2.<sup>6</sup>

Tafel plots were obtained after the measured LSV currents were corrected for diffusion to yield the corresponding kinetic current values. The  $j_L$  parameter, obtained through the combination of Eq. 2 and 3, was used to make the mass transport correction. The values of  $j_k$  obtained were normalized for the total deposited mass of EC.

Rotating ring disk electrode (RRDE) measurements in O<sub>2</sub>-saturated KOH solution were also performed in order to obtain a more in-depth insight of the ORR electrocatalytic activity of the ECs. The H<sub>2</sub>O<sub>2</sub> yields were determined from the ring and disk currents ( $i_R$  and  $i_D$ , respectively), and the current collection efficiency of the Pt ring ( $N = 0.25$ , in this case) using Eq. 1:<sup>7</sup>

$$\% \text{ H}_2\text{O}_2 = 200 \times \frac{i_R / N}{i_D + i_R / N} \quad (\text{Eq. 4})$$

#### 1.3.4. OER performance

OER studies were performed in N<sub>2</sub>-saturated alkaline electrolyte, 0.1 M KOH solution purged with N<sub>2</sub> for at least 30 min before the measurement. LSVs were obtained by sweeping the potential from 0.87 to 1.87 V (vs. RHE) with a scan rate of 0.005 V s<sup>-1</sup> at 1600 rpm. All presented LSV tests were performed with  $i_R$ -compensation, via previous calculation of the uncompensated resistance (Ru) of the circuit by using  $i$ -interrupt approach, and finally, applying an  $i_R$ -compensation value equal to 0.90×Ru to the LSV measurement. Tafel slopes were determined by linear fitting of LSV data to the following equation:

$$\eta = a + b \times \log |j| \quad (\text{Eq. 1})$$

where  $\eta$  is the overpotential,  $b$  is the Tafel slope, and  $j$  is the current density.

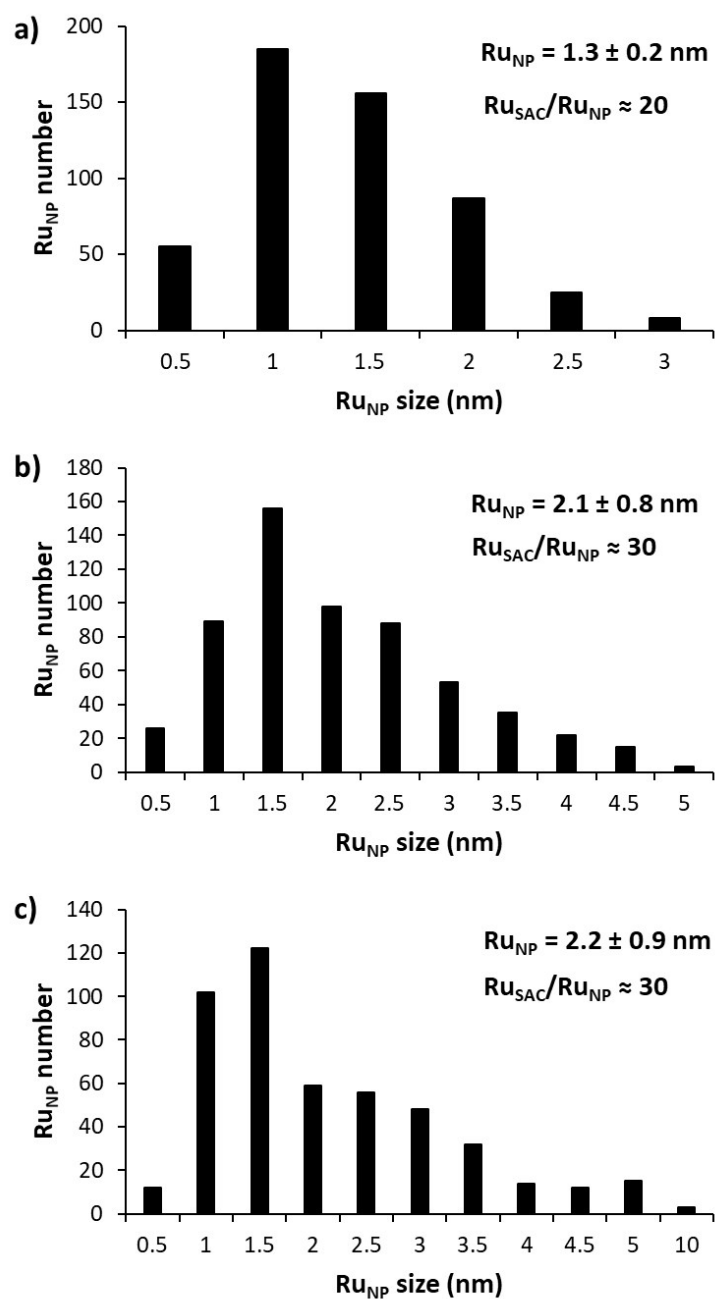

**Figure S1.** Histograms of  $Ru_{NP}$  size distribution, mean  $Ru_{NP}$  size and  $Ru_{SAC}/Ru_{NP}$  ratio of: a) Ru/CNT; b) Ru/CNT<sub>4NA</sub> (after 4NA catalytic reduction); and c) Ru/CNT<sub>4NP</sub> (after 4NP catalytic reduction).

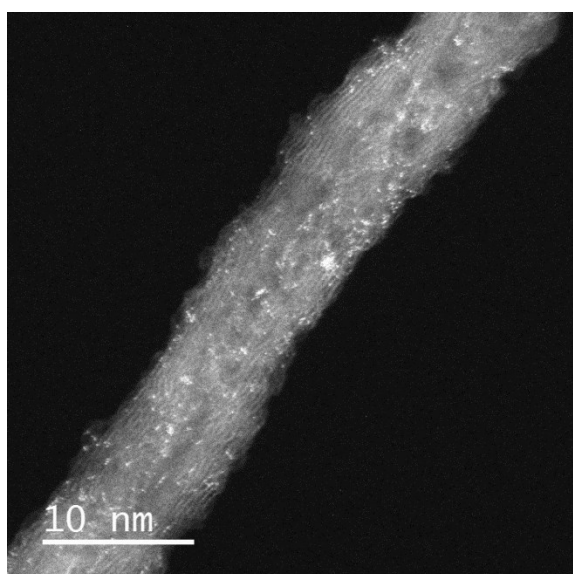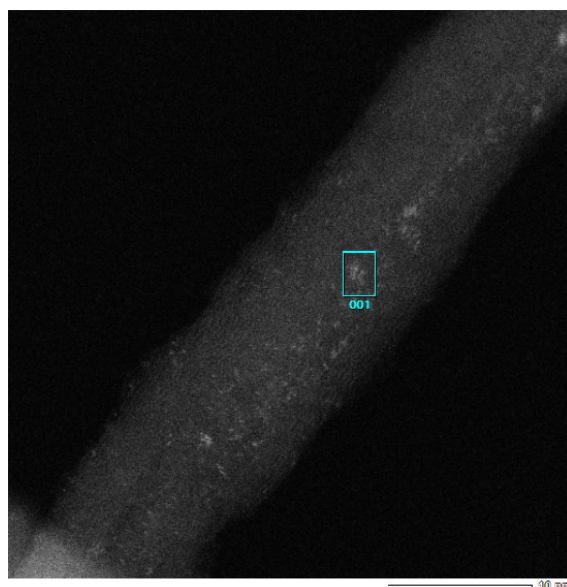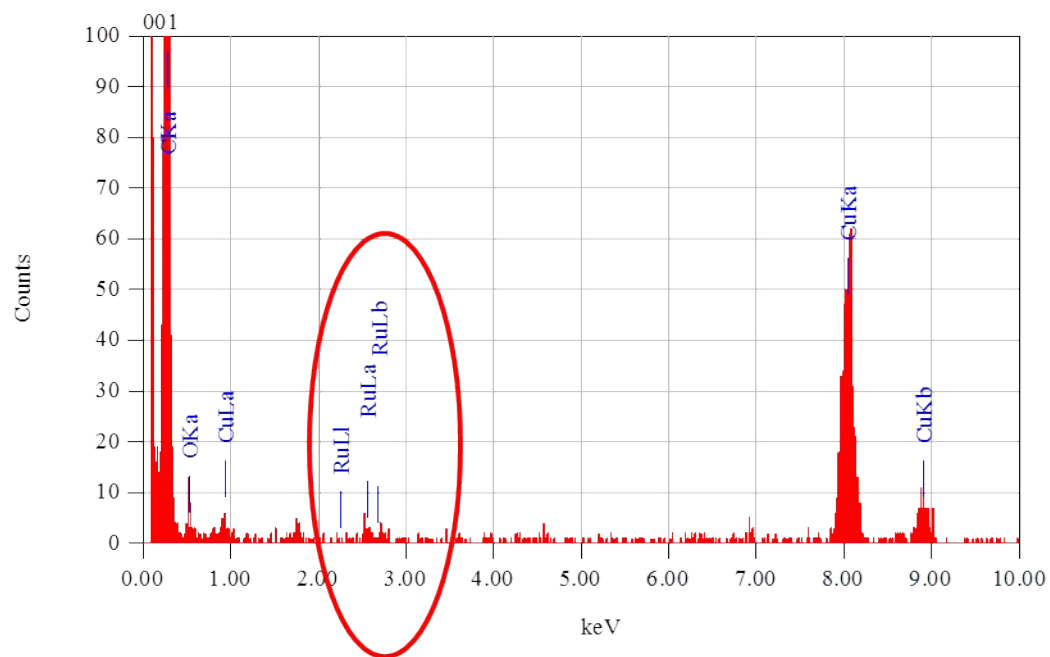

**Figure S2.** STEM-HAADF analyses of a zone containing mainly Ru<sub>SAC</sub> and respective EDX analysis.

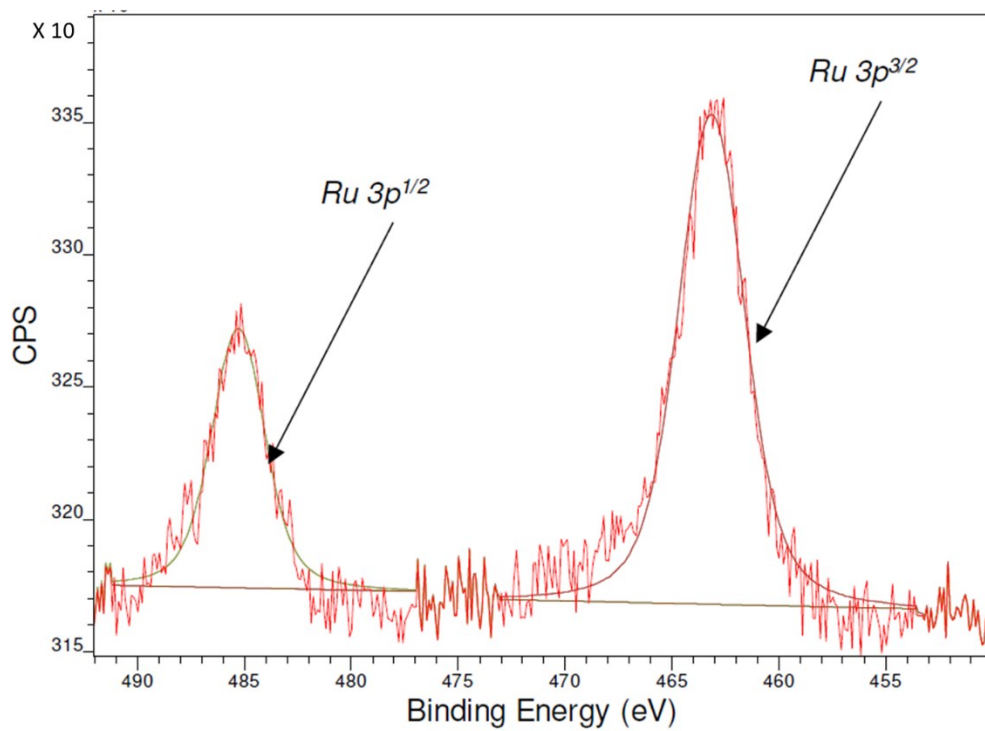

**Figure S3.** High-resolution XPS spectrum of Ru 3p of the Ru/CNT catalyst.



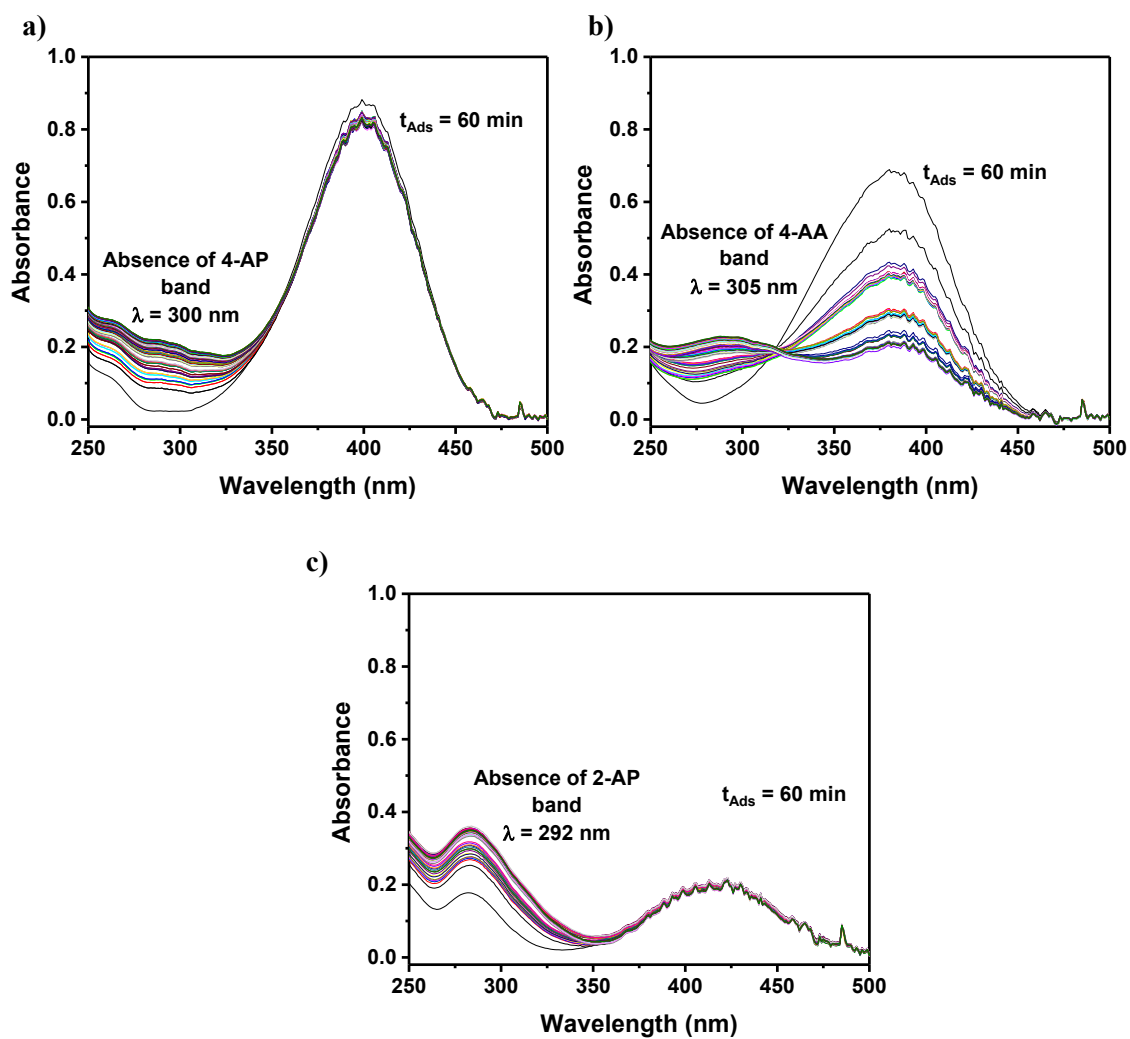

**Figure S4.** UV-Vis spectra of the nitroarenes adsorption tests onto Ru/CNT material (conditions:  $|\text{nitroarene}| = 0.05 \text{ mM}$ ;  $|\text{Ru/CNT}| = 1 \text{ mg mL}^{-1}$ ; adsorption time = 60 min): a) 4-NP, b) 4-NA and c) 2-NP.

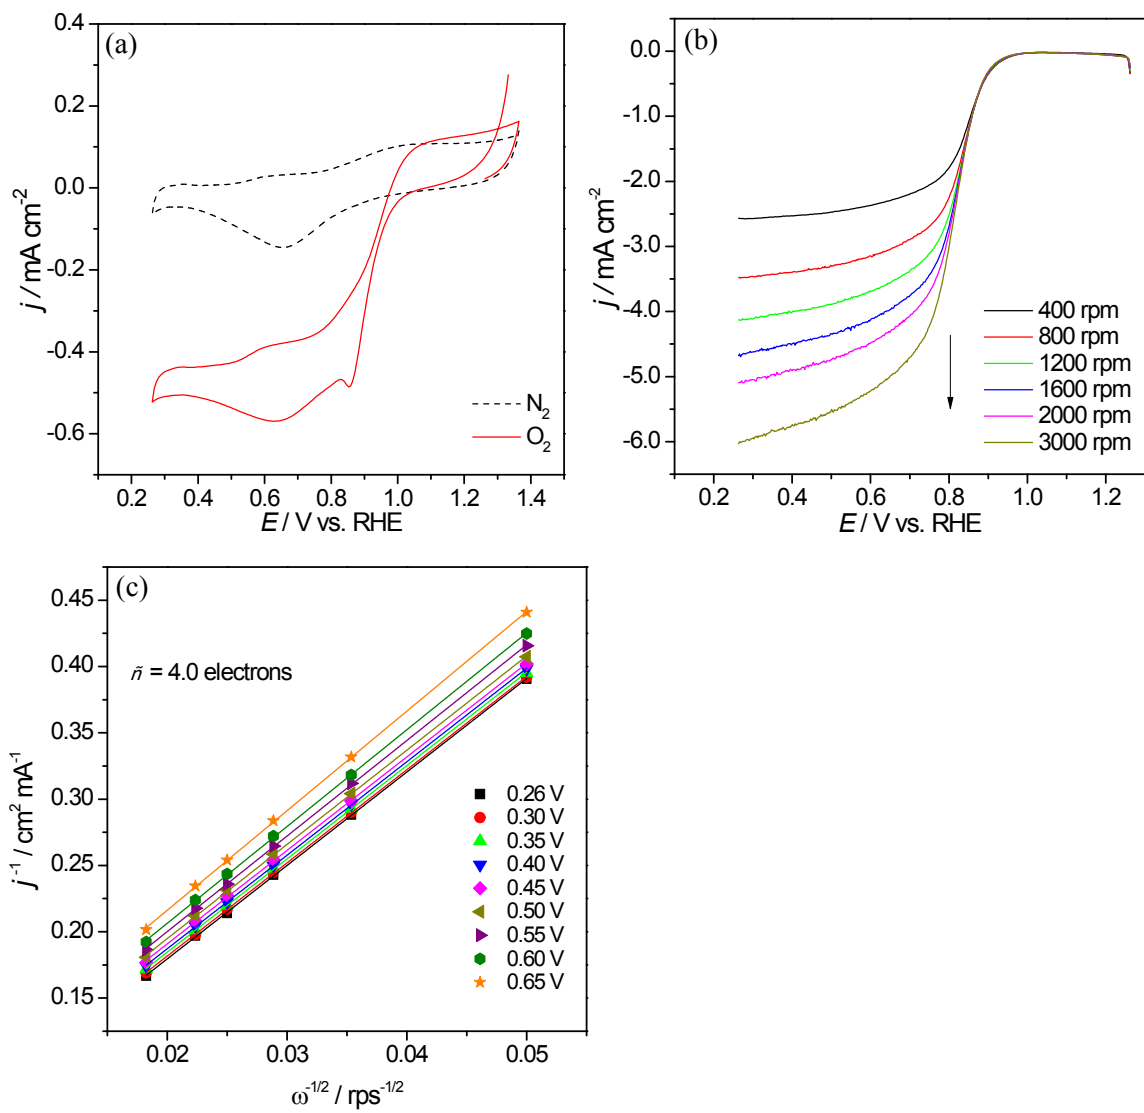

**Figure S5.** CVs of commercial Pt/C (20 wt %) modified electrode in N<sub>2</sub>-saturated (dash line) and O<sub>2</sub>-saturated (full line) 0.1 mol dm<sup>-3</sup> KOH solution at 0.005 V s<sup>-1</sup> (a), ORR polarization curves at different rotation rates in O<sub>2</sub>-saturated 0.1 mol dm<sup>-3</sup> KOH solution at 0.005 V s<sup>-1</sup> (b) and the corresponding KL plots (c).

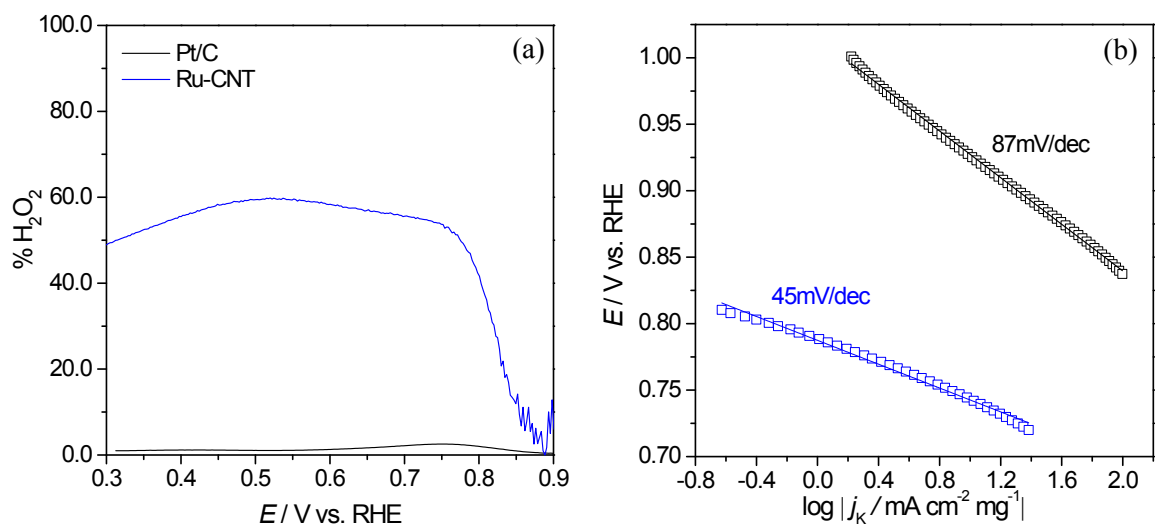

**Figure S6.** Estimated percentage of  $\text{H}_2\text{O}_2$  formed (a) and ORR Tafel plots (b) of Ru/CNT (blue) and Pt/C (black) obtained from LSV curves in  $\text{O}_2$ -saturated  $0.1 \text{ mol dm}^{-3}$  KOH solution, at 1600 rpm and  $\nu = 0.005 \text{ V s}^{-1}$ .

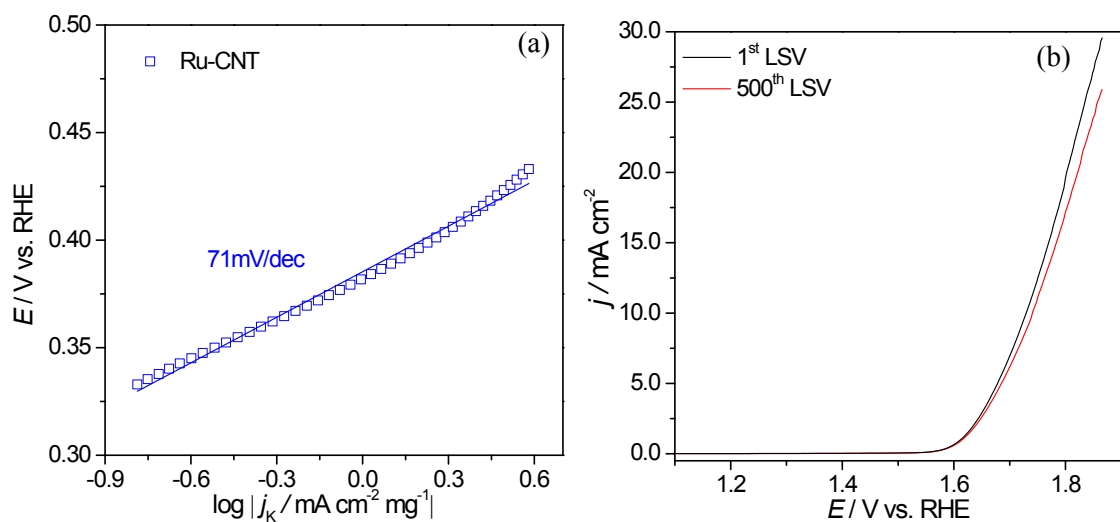

**Figure S7.** OER Tafel plot (a) and stability test (b) of Ru/CNT in  $\text{O}_2$ -saturated KOH, at 1600 rpm and  $\nu = 0.005 \text{ V s}^{-1}$ .

## References

1. R. C. Contreras, B. Guicheret, B. F. Machado, C. Rivera-Carcamo, M. A. C. Alvarez, B. V. Salas, M. Rutttert, T. Placke, A. F. Reguillon, L. Vanoye, C. de Bellefon, R. Philippe and P. Serp, *J. Catal.*, 2019, **372**, 226-244.
2. J. H. Scofield, *J. Electron Spectrosc. Relat. Phenom.*, 1976, **8**, 129-137.
3. C. Freire, D. M. Fernandes, M. Nunes and V. K. Abdelkader, *ChemCatChem*, 2018, **10**, 1703-1730.
4. N. Daems, X. Sheng, I. F. J. Vankelecom and P. P. Pescarmona, *J. Mater. Chem. A*, 2014, **2**, 4085-4110.
5. X. J. Zhou, J. L. Qiao, L. Yang and J. J. Zhang, *Adv. Energy Mater.*, 2014, **4**, 25.
6. G. Tuci, C. Zafferoni, A. Rossin, A. Milella, L. Luconi, M. Innocenti, L. T. Phuoc, D. V. Cuong, P. H. Cuong and G. Giambastian, *Chem. Mat.*, 2014, **26**, 3460-3470.
7. D. M. Fernandes, P. Mathumba, A. J. S. Fernandes, E. I. Iwuoha and C. Freire, *Electrochim. Acta*, 2019, **319**, 72-81.
